# Supplementary material for: Experiences and attitudes of breastfeeding mothers related to support on their breastfeeding journeys: a reflexive thematic analysis
Source: Research Square preprint supplement (doi:10.21203/rs.3.rs-7243754/v1), 2025-09-11
Supplement: Supplementary file 1 [file 00c8333be2bd6cd21aa60259.docx]

**Interview Schedule**

1. How long did you breastfeed for?
   1. If more than one child – question is valid for each child
2. Why did you stop breastfeeding?
   1. If more than one child – question is valid for each child
3. Why did you want to breastfeed?
4. Were you breastfed yourself?
5. What is your mother's view/attitude towards breastfeeding?
6. Was this important for you?
7. What is your partner’s view/attitude towards breastfeeding?
8. Was this important for you?
9. Who else gave you support? And how was this support?
10. Did you go to classes/drop ins? If so, did that help?
11. How did it make you feel to breastfeed?
12. Please tell me about your best breastfeeding experience.
13. Please tell me about your worst breastfeeding experience.
14. How do you think can society help mothers to breastfeed more and longer?
15. In what way is society unhelpful?
16. What is one thing you wish you had known before / could tell yourself at the start of your journey?
17. Is there anything that we didn’t speak about that you would like to add or discuss?
