# Supplementary material for: Experiences and attitudes of breastfeeding mothers related to support on their breastfeeding journeys: a reflexive thematic analysis
Source: Research Square preprint supplement (doi:10.21203/rs.3.rs-7243754/v1), 2025-09-11
Supplement: Supplementary file 2 [file 45b4e48f0ebc3994433e55cb.docx]

**Appendices**

**Appendix 1: Interview Schedule**

1. How long did you breastfeed for?
   1. If more than one child – question is valid for each child
2. Why did you stop breastfeeding?
   1. If more than one child – question is valid for each child
3. Why did you want to breastfeed?
4. Were you breastfed yourself?
5. What is your mother's view/attitude towards breastfeeding?
6. Was this important for you?
7. What is your partner’s view/attitude towards breastfeeding?
8. Was this important for you?
9. Who else gave you support? And how was this support?
10. Did you go to classes/drop ins? If so, did that help?
11. How did it make you feel to breastfeed?
12. Please tell me about your best breastfeeding experience.
13. Please tell me about your worst breastfeeding experience.
14. How do you think can society help mothers to breastfeed more and longer?
15. In what way is society unhelpful?
16. What is one thing you wish you had known before / could tell yourself at the start of your journey?
17. Is there anything that we didn’t speak about that you would like to add or discuss?

**Appendix 2: Full list of initial codes**

**Breastfeeding is hard (4)**

- Expressing is difficult (1)
- Cluster feeding (2)
- Beginning is super hard (7)
- Always needed (3)
- Hard to stop breastfeeding (1)
- Sacrifices for your baby (19)
- Sharing my body and time (12)
- Wanting my body back (7)

**Breastfeeding is magic (4)**

- Natural thing to do (5)
- Your body knows what to do (4)
- Mother instinct (1)
- Inner knowing (3)
- Superpower (1)
- I am so lucky (7)
- Benefits (9)
- More than only food (3)
- Bonding experience (12)
- Motherhood experience (11)
- Connection with baby (2)
- All they need (7)
- Convenience (6)
- Just relax & enjoy (6)

**Support is everything (13)**

- Support from own mother (12)
  - Own mother's experience (1)
  - Not being breastfed herself (1)
- Support from health care professionals (21)
- Support from other mums (16)
- Continuity of care (3)
- Support from partner (15)
- Why did no one tell me this? (6)
- Everyone says something different (7)
- The village (3)
- Standing on shoulders of generations before us (1)
- Women's experiences (1)
- Expectations (4)
  - Normal thing to do. The norm. (2)
- Expectations from others (10)
- Judgement from others (18)
  - Private experience (2)

**All the feels, all the time**

- 2 things are true (3)
- Pride (2)
- Responsibility (1)
- Us against the world (5)
- Isolation (6)
- Bubble/Cocoon (5)
- Determination (3)
- Guilt (1)
- Being a real mum (1)
- Self-conscious (7)
- Embarrassed (6)
- Insecurity (15)
- Confidence (3)
  - First vs second child (13)
- Blame (3)

**Codes not used for themes**

- Cultural differences (3)
- Child led decision (2)
- Tips and tricks for breastfeeding (3)
- Skin to Skin (3)
- Important to me to breastfeed (2)
- Breastfeeding is taboo (3)
- Mother Lion Mode (1)
- Circumstances (6)
- Knowledge (7)
- Education (1)
- Maternity leave (5)
- Financial aspect (9)
- Promoting formula (5)

**Appendix 3: Ethics Review Decision Letter**


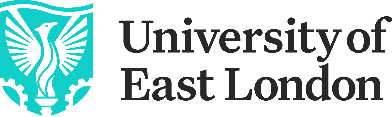


**School of Psychology Ethics Committee**

**NOTICE OF ETHICS REVIEW DECISION LETTER**

**For research involving human participants**

BSc/MSc/MA/Professional Doctorates in Clinical, Counselling and Educational Psychology

**Reviewer:** Please complete sections in **blue** **|** **Student:** Please complete/read sections in **orange**

| **Details** | | | | | | |
| --- | --- | --- | --- | --- | --- | --- |
| **Reviewer:** | | **Anna Stone** | | | | |
| **Supervisor:** | | **Caroline Edmonds** | | | | |
| **Student:** | | **XXXXX** | | | | |
| **Course:** | | **MSc Psychology** | | | | |
| **Title of proposed study:** | | Thematic Analysis on how (internal) motivation and (external) attitudes towards breastfeeding influence a breastfeeding journey. | | | | |
| **Checklist**  (Optional) | | | | | | |
|  | | | | **YES** | **NO** | **N/A** |
| Concerns regarding study aims (e.g., ethically/morally questionable, unsuitable topic area for level of study, etc.) | | | |  |  |  |
| Detailed account of participants, including inclusion and exclusion criteria | | | |  |  |  |
| Concerns regarding participants/target sample | | | | ☐ | ☐ | ☐ |
| Detailed account of recruitment strategy | | | |  |  |  |
| Concerns regarding recruitment strategy | | | | ☐ | ☐ | ☐ |
| All relevant study materials attached (e.g., freely available questionnaires, interview schedules, tests, etc.) | | | |  |  |  |
| Study materials (e.g., questionnaires, tests, etc.) are appropriate for target sample | | | | ☐ | ☐ | ☐ |
| Clear and detailed outline of data collection | | | |  |  |  |
| Data collection appropriate for target sample | | | | ☐ | ☐ | ☐ |
| If deception being used, rationale provided, and appropriate steps followed to communicate study aims at a later point | | | |  |  |  |
| If data collection is not anonymous, appropriate steps taken at later stages to ensure participant anonymity (e.g., data analysis, dissemination, etc.) – anonymisation, pseudonymisation | | | |  |  |  |
| Concerns regarding data storage (e.g., location, type of data, etc.) | | | |  |  |  |
| Concerns regarding data sharing (e.g., who will have access and how) | | | |  |  |  |
| Concerns regarding data retention (e.g., unspecified length of time, unclear why data will be retained/who will have access/where stored) | | | |  |  |  |
| If required, General Risk Assessment form attached | | | | ☐ | ☐ | ☐ |
| Any physical/psychological risks/burdens to participants have been sufficiently considered and appropriate attempts will be made to minimise | | | | ☐ | ☐ | ☐ |
| Any physical/psychological risks to the researcher have been sufficiently considered and appropriate attempts will be made to minimise | | | |  |  |  |
| If required, Country-Specific Risk Assessment form attached | | | |  |  |  |
| If required, a DBS or equivalent certificate number/information provided | | | |  |  |  |
| If required, permissions from recruiting organisations attached (e.g., school, charity organisation, etc.) | | | |  |  |  |
| All relevant information included in the participant information sheet (PIS) | | | |  |  |  |
| Information in the PIS is study specific | | | |  |  |  |
| Language used in the PIS is appropriate for the target audience | | | |  |  |  |
| All issues specific to the study are covered in the consent form | | | |  |  |  |
| Language used in the consent form is appropriate for the target audience | | | |  |  |  |
| All necessary information included in the participant debrief sheet | | | |  |  |  |
| Language used in the debrief sheet is appropriate for the target audience | | | |  |  |  |
| Study advertisement included | | | |  |  |  |
| Content of study advertisement is appropriate (e.g., researcher’s personal contact details are not shared, appropriate language/visual material used, etc.) | | | |  |  |  |
| **Decision options** | | | | | | |
| **APPROVED** | Ethics approval for the above-named research study has been granted from the date of approval (see end of this notice), to the date it is submitted for assessment. | | | | | |
| **APPROVED - BUT MINOR AMENDMENTS ARE REQUIRED BEFORE THE RESEARCH COMMENCES** | In this circumstance, the student must confirm with their supervisor that all minor amendments have been made **before** the research commences. Students are to do this by filling in the confirmation box at the end of this form once all amendments have been attended to and emailing a copy of this decision notice to the supervisor. The supervisor will then forward the student’s confirmation to the School for its records.  **Minor amendments guidance:** typically involve clarifying/amending information presented to participants (e.g., in the PIS, instructions), further detailing of how data will be securely handled/stored, and/or ensuring consistency in information presented across materials. | | | | | |
| **NOT APPROVED - MAJOR AMENDMENTS AND RE-SUBMISSION REQUIRED** | In this circumstance, a revised ethics application **must** be submitted and approved **before** any research takes place. The revised application will be reviewed by the same reviewer. If in doubt, students should ask their supervisor for support in revising their ethics application.  **Major amendments guidance:** typically insufficient information has been provided, insufficient consideration given to several key aspects, there are serious concerns regarding any aspect of the project, and/or serious concerns in the candidate’s ability to ethically, safely and sensitively execute the study. | | | | | |
| **Decision on the above-named proposed research study** | | | | | | |
| **Please indicate the decision:** | APPROVED | | | | | |
| **Minor amendments** | | | | | | |
| Please clearly detail the amendments the student is required to make | | | | | | |
|  | | | | | | |
| **Major amendments** | | | | | | |
| Please clearly detail the amendments the student is required to make | | | | | | |
|  | | | | | | |
| **Assessment of risk to researcher** | | | | | | |
| **Has an adequate risk assessment been offered in the application form?** | **YES** | | **NO** | | | |
| If no, please request resubmission with an **adequate risk assessment.** | | | | | |
| **If the proposed research could expose the researcher to any kind of emotional, physical or health and safety hazard, please rate the degree of risk:** | | | | | | |
| **HIGH** | Please **do not approve a high-risk** application. Travel to countries/provinces/areas deemed to be high risk should not be permitted and an application not be approved on this basis. If unsure, please refer to the Chair of Ethics. | |  | | | |
| **MEDIUM** | Approve but include appropriate recommendations in the below box. | |  | | | |
| **LOW** | Approve and if necessary, include any recommendations in the below box. | |  | | | |
| **Reviewer recommendations in relation to risk (if any):** | Please insert any recommendations | | | | | |
| **Reviewer’s signature** | | | | | | |
| **Reviewer:**  (Typed name to act as signature) | | **Anna Stone** | | | | |
| **Date:** | | **01/08/2024** | | | | |
| ***This reviewer has assessed the ethics application for the named research study on behalf of the School of Psychology Ethics Committee*** | | | | | | |
| **RESEARCHER PLEASE NOTE**  For the researcher and participants involved in the above-named study to be covered by UEL’s Insurance, prior ethics approval from the School of Psychology (acting on behalf of the UEL Ethics Committee), and confirmation from students where minor amendments were required, must be obtained before any research takes place.  For a copy of UEL’s Personal Accident & Travel Insurance Policy, please see the Ethics Folder in the Psychology Noticeboard. | | | | | | |
| **Confirmation of minor amendments**  (Student to complete) | | | | | | |
| **I have noted and made all the required minor amendments, as stated above, before starting my research and collecting data** | | | | | | |
| **Student name:**  (Typed name to act as signature) | | Please type your full name | | | | |
| **Student number:** | | Please type your student number | | | | |
| **Date:** | | Click or tap to enter a date | | | | |
| ***Please submit a copy of this decision letter to your supervisor with this box completed if minor amendments to your ethics application are required*** | | | | | | |

**Appendix 4: Participant Information Sheet**


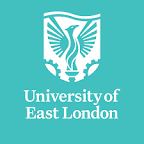


**PARTICIPANT INFORMATION SHEET (8th August 2024)**

**Title of research:** What do women need in order to pursue and persist with breastfeeding?

**Contact person:** Renate Uijtewaal

**Email:** 2444464@uel.ac.uk

You are being invited to participate in a research study. Before you decide whether to take part or not, please carefully read through the following information which outlines what your participation would involve. Feel free to talk with others about the study (e.g., friends, family, etc.) before making your decision. If anything is unclear or you have any questions, please do not hesitate to contact me on the above email.

**Who am I?**

My name is Renate Uijtewaal.I am a postgraduate student in the School of Psychology at the University of East London (UEL) and am studying for MSc in Psychology. As part of my studies, I am conducting the research that you are being invited to participate in.

**What is the purpose of the research?**

I am conducting research into how (internal) motivation and (external) attitudes towards breastfeeding influence a breastfeeding journey. The aim is to understand how we can help women feel comfortable to breastfeed and go through it despite obstacles, and what support is needed for women to thrive.

**Why have I been invited to take part?**

To address the study aims, I am inviting mothers who have breastfed for longer than 6 months to take part in my research. It is entirely up to you whether you take part or not, participation is voluntary.

**What will I be asked to do if I agree to take part?**

If you agree to take part, you will be asked to be interviewed for maximum 60 minutes in the comfort of your own home (through online application). The interview will feel like having an informal chat, and will be recorded (audio only) with MS Teams in order to create a transcript.

**Can I change my mind?**

Yes, you can change your mind at any time and withdraw without explanation, disadvantage or consequence. If you would like to withdraw from the interview you can do so by letting me know. If you withdraw, your data will not be used as part of the research.

Separately, you can also request to withdraw your data from being used even after you have taken part in the study, provided that this request is made within 3 weeks of the data being collected (after which point the data analysis will begin, and withdrawal will not be possible).

**Are there any disadvantages to taking part?**

There are no disadvantages to taking part.

**How will the information I provide be kept secure and confidential?**

- Participants will not be identified by the data collected, on any material resulting from the data collected, or in any write-up of the research.
- Personal contact details will not be stored.
- The research data will be securely stored on my (password protected) personal pc.
- Data will be transferred via secure UEL emails.
- Only my supervisor and me will have access to the anonymised data as well as the examiners when the paper is submitted.
- Your and your child’s names will be pseudonymised in order to anonymise you.
- The interview recordings will be deleted after the interviews have been transcribed.

For the purposes of data protection, the University of East London is the Data Controller for the personal information processed as part of this research project. The University processes this information under the ‘public task’ condition contained in the General Data Protection Regulation (GDPR). Where the University processes particularly sensitive data (known as ‘special category data’ in the GDPR), it does so because the processing is necessary for archiving purposes in the public interest, or scientific and historical research purposes or statistical purposes. The University will ensure that the personal data it processes is held securely and processed in accordance with the GDPR and the Data Protection Act 2018. For more information about how the University processes personal data please see www.uel.ac.uk/about/about-uel/governance/information-assurance/data-protection

**What will happen to the results of the research?**

The research will be written up as a thesis and submitted for assessment. Findings may be disseminated to a range of audiences (e.g., academics, clinicians, public, etc.) through journal articles, conference presentations, talks, magazine articles, blogs. In all material produced, your identity will remain anonymous, in that, it will not be possible to identify you personally [personally identifying information will either be removed.

You will be given the option to receive a summary of the research findings once the study has been completed.

Data will be retained for up to 10 years from the date of publication of any journal article arising from this work. If the data are not published the data will be retained for 3 years.

**Who has reviewed the research?**

My research has been approved by the School of Psychology Research Ethics Committee. This means that the Committee’s evaluation of this ethics application has been guided by the standards of research ethics set by the British Psychological Society.

**What if I been adversely affected by taking part?**

It is not anticipated that you will have been adversely affected by taking part in the research, and all reasonable steps have been taken to minimise distress or harm of any kind. Nevertheless, it is possible that your participation may have been challenging, distressing or uncomfortable in some way. If you have been affected in any of those ways, you may find the following resources/services helpful in relation to obtaining information and support:

- National Breastfeeding Helpline: 0300 100 0212. The helpline is run in collaboration with the Breastfeeding Network (BfN) and the Association of Breastfeeding Mothers (ABM). All the volunteers answering calls are mums who have breastfed, and all have received extensive training in breastfeeding support.
- Mother support groups: The Association of Breastfeeding Mothers (ABM), The Breastfeeding Network (BfN) – including the Drugs in Breastmilk Information Service, La Leche League GB (LLLGB), The Multiple Births Foundation, The National Childbirth Trust (NCT).
- Free Mental Health Support (supported self-help) is available for adults living in England through https://www.mind.org.uk/.

**Who can I contact if I have any questions/concerns?**

If you would like further information about my research or have any questions or concerns, please do not hesitate to contact me.

Renate Uijtewaal, 2444464@uel.ac.uk

If you have any questions or concerns about how the research has been conducted, please contact my research supervisor Prof. Caroline Edmonds. School of Psychology, University of East London, Water Lane, London E15 4LZ,

Email: c.edmonds@uel.ac.uk

**or**

Chair of School Research Ethics Committee: Dr Trishna Patel, School of Psychology, University of East London, Water Lane, London E15 4LZ. (Email: t.patel@uel.ac.uk)

**Thank you for taking the time to read this information sheet**

**Appendix 5: Consent Form**


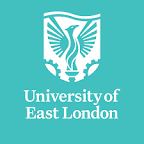


**CONSENT TO PARTICIPATE IN A RESEARCH STUDY**

**Title of research:** What do women need in order to pursue and persists breastfeeding?

**Contact person:** Renate Uijtewaal

**Email:** 2444464@uel.ac.uk

|  | **Please initial** |
| --- | --- |
| I confirm that I have read the participant information sheet dated 08/08/2024 (version 1) for the above study and that I have been given a copy to keep. |  |
| I have had the opportunity to consider the information, ask questions and have had these answered satisfactorily. |  |
| I understand that my participation in the study is voluntary and that I may withdraw at any time, without explanation or disadvantage. |  |
| I understand that if I withdraw during the study, my data will not be used. |  |
| I understand that I have 3 weeks from the date of the interview to withdraw my data from the study. |  |
| I understand that the interview will be recorded using Microsoft Teams. |  |
| I understand that my personal information and data, including audio recordings from the research will be securely stored and remain confidential. Only the research team will have access to this information, to which I give my permission. |  |
| It has been explained to me what will happen to the data once the research has been completed. |  |
| I understand that short, anonymised quotes from my interview may be used in material such as conference presentations, reports, articles in academic journals resulting from the study and that these will not personally identify me. |  |
| I would like to receive a summary of the research findings once the study has been completed and am willing to provide contact details for this to be sent to. |  |
| I agree to take part in the above study. |  |

Participant’s Name (BLOCK CAPITALS)

…………………………………………………………………………………………………………

Participant’s Signature

…………………………………………………………………………………………………………

Researcher’s Name (BLOCK CAPITALS)

…………………………………………………………………………………………………………

Researcher’s Signature

…………………………………………………………………………………………………………

Date

……………………..…………………………………………………………………………………

**Appendix 6: Participant Debrief Sheet**


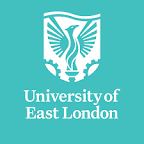


**PARTICIPANT DEBRIEF SHEET**

**Title of research:** What do women need in order to pursue and persist with breastfeeding?

Thank you for participating in my research study on how society can help women feel comfortable to breastfeed and go through it despite obstacles, and what support is needed for women to thrive. This document offers information that may be relevant in light of you having now taken part.

**How will my data be managed?**

The University of East London is the Data Controller for the personal information processed as part of this research project. The University will ensure that the personal data it processes is held securely and processed in accordance with the GDPR and the Data Protection Act 2018. More detailed information is available in the Participant Information Sheet, which you received when you agreed to take part in the research.

**What will happen to the results of the research?**

The research will be written up as a thesis and submitted for assessment. Findings may also be disseminated to a range of audiences (e.g., academics, clinicians, public, etc.) through journal articles, conference presentations, talks, magazine articles, blogs. In all material produced, your identity will remain anonymous, in that, it will not be possible to identify you personally as personally identifying information will be removed.

You will be given the option to receive a summary of the research findings once the study has been completed.

Data will be retained for up to 10 years from the date of publication of any journal article arising from this work. If the data are not published the data will be retained for 3 years.

**What if I been adversely affected by taking part?**

It is not anticipated that you will have been adversely affected by taking part in the research, and all reasonable steps have been taken to minimise distress or harm of any kind. Nevertheless, it is possible that your participation – or its after-effects – may have been challenging, distressing or uncomfortable in some way. If you have been affected in any of those ways, you may find the following resources/services helpful in relation to obtaining information and support:

- National Breastfeeding Helpline: 0300 100 0212. The helpline is run in collaboration with the Breastfeeding Network (BfN) and the Association of Breastfeeding Mothers (ABM). All the volunteers answering calls are mums who have breastfed, and all have received extensive training in breastfeeding support.
- Mother support groups: The Association of Breastfeeding Mothers (ABM), The Breastfeeding Network (BfN) – including the Drugs in Breastmilk Information Service, La Leche League GB (LLLGB), The Multiple Births Foundation, The National Childbirth Trust (NCT).
- Free Mental Health Support (supported self-help) is available for adults living in England through https://www.mind.org.uk/.

**Who can I contact if I have any questions/concerns?**

If you would like further information about my research or have any questions or concerns, please do not hesitate to contact me.

Renate Uijtewaal, 2444464@uel.ac.uk

If you have any questions or concerns about how the research has been conducted, please contact my research supervisor Prof. Caroline Edmonds. School of Psychology, University of East London, Water Lane, London E15 4LZ,

Email: [c.edmonds@uel.ac.uk](mailto:c.edmonds@uel.ac.uk)

**or**

Chair of School Research Ethics Committee: Dr Trishna Patel, School of Psychology, University of East London, Water Lane, London E15 4LZ.

(Email: t.patel@uel.ac.uk)

**Thank you for taking part in my study!**
